# Supplementary material for: Cellulose degradation and assimilation by the unicellular phototrophic eukaryote Chlamydomonas reinhardtii
Source: Springer Nature journal article supplement (doi:10.1038/ncomms2210), 2012-11-15
Supplement: 41467_2012_BFncomms2210_MOESM1392_ESM.pdf [file 41467_2012_BFncomms2210_MOESM1392_ESM.pdf]

## Supplementary Information

### Cellulose degradation and assimilation by the unicellular phototrophic eukaryote

#### *Chlamydomonas reinhardtii*

Olga Blifernez-Klassen, Viktor Klassen, Anja Doebbe, Klaudia Kersting, Philipp Grimm, Lutz Wobbe  
& Olaf Kruse\*

Bielefeld University, Algae Biotechnology & Bioenergy group/ Dep. of Biology - Center for  
Biotechnology (CeBiTec); Bielefeld/ Germany

\*to whom correspondence should be addressed: olaf.kruse@uni-bielefeld.de

#### **This PDF file includes:**

Supplementary Figure S1

Supplementary Tables S1/S2/S3/S4

Supplementary references (60-71)

## Supplementary Figure S1

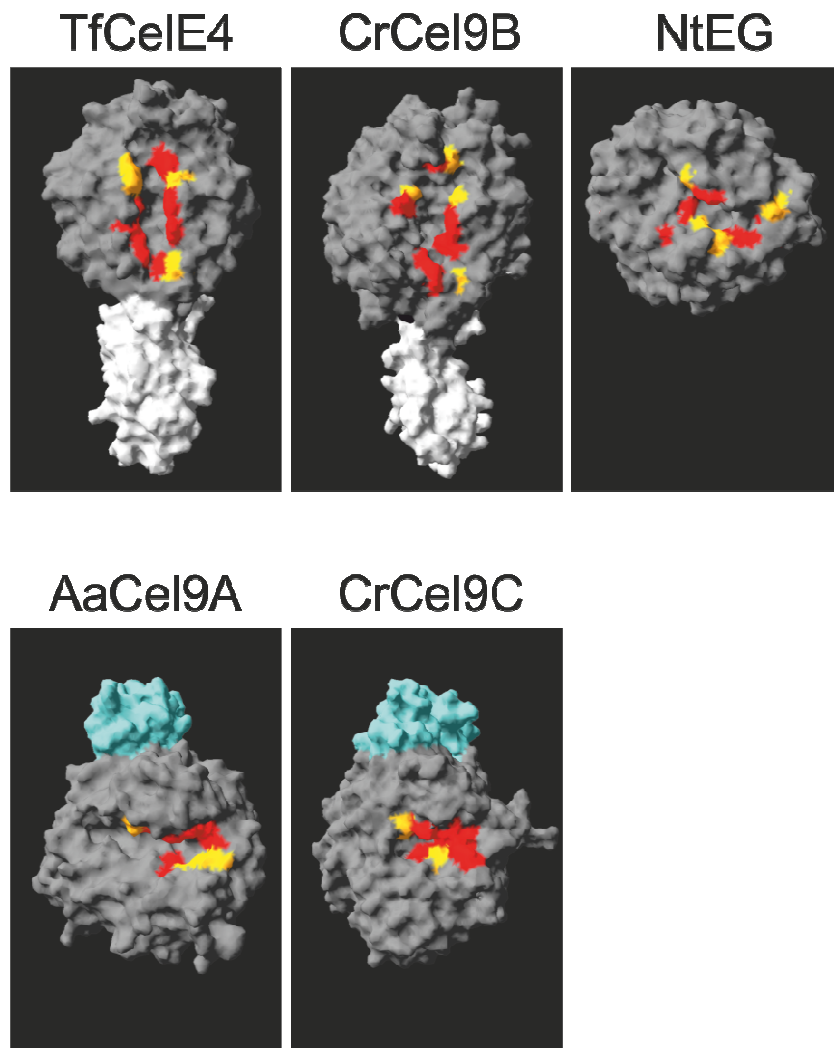

### Supplementary Figure S1 - Surface plots and homology models

Surface plots of TfCelE4 from *Thermomonospora fusca* [Protein Data Bank code (PDB): 1JS4]<sup>26</sup>, NtEG from the termite *Nasutitermes takasagoensis* [PDB 1KS8]<sup>60</sup> and AaCel9A from *Alicyclobacillus acidocaldarius* [PDB 3GZK]<sup>27</sup>. Homology models of the *Chlamydomonas reinhartii* cellulases CrCel9B (UniProtKB A8JFG8) and CrCel9C (UniProtKB A8JFH1) created with I-TASSER<sup>25</sup>. The catalytic domains are colored in grey and the cellulose binding domain of TfCelE4 is shown in white. A turquoise color indicates the position of the immunoglobulin-like domain in AaCel9A. Red and yellow colors within the catalytic domain indicate the conserved aromatic residues (red means fully conserved, yellow non-conserved among the species), which are involved in substrate stacking<sup>26-27,60-</sup>

**Supplementary Table S1.**

| Protein | UniProt | Phytozome     | GF | Secretion                     |                         |                              | C-score<br>EC No.<br>(EC score)<br><i>function</i>            | Structural homolog<br>(PDB)<br><i>TM score</i>   |
|---------|---------|---------------|----|-------------------------------|-------------------------|------------------------------|---------------------------------------------------------------|--------------------------------------------------|
|         |         |               |    | TargetP1.1<br>(RC/score)      | SignalP<br>4.0<br>(DS)  | SecretomeP<br>2.0<br>(SecPS) |                                                               |                                                  |
| CrBG11  | A8I718  |               | 1  | other location<br>(RC2/0.868) | non-secreted<br>(0.135) | non-secreted<br>(0.423)      | -2.29<br>3.2.1.21<br>(0.9082)<br><i>β-glucosidase</i>         | Taglu1b<br>(2DGA)<br>0.6569                      |
|         |         | Cre07.g320850 | 1  | other location<br>(RC2/0.868) | non-secreted<br>(0.135) | non-secreted<br>(0.367)      |                                                               |                                                  |
| CrBG12  | A8IEM7  |               | 1  | other location<br>(RC2/0.817) | non-secreted<br>(0.110) | secreted<br>(0.657)          | -2.60<br>3.2.1.21<br>(0.6136)<br><i>β-glucosidase</i>         | Taglu1b<br>(2DGA)<br>0.6136                      |
|         |         | Cre03.g171050 |    | other location<br>(RC2/0.817) | non-secreted<br>(0.110) | non-secreted<br>(0.319)      |                                                               |                                                  |
| CrCel9B | A8JFG8  |               | 9  | secreted<br>(RC2/0.88)        | secreted<br>(0.741)     | secreted<br>(0.757)          | -0.28<br>3.2.1.4<br>(1.5814)<br><i>endo-1,4-β-D-glucanase</i> | <i>endo/exo-cellulase E4</i><br>(1JS4)<br>0.8213 |
|         |         | Cre17.g730600 |    | mitochondria<br>(RC4/0.614)   | non-secreted<br>(0.145) | non-secreted<br>(0.364)      |                                                               |                                                  |
| CrCel9C | A8JFH1  |               | 9  | chloroplast<br>(RC5/0.228)    | non-secreted<br>(0.321) | secreted<br>(0.506)          | -0.09<br>3.2.1.4<br>(0.8799)<br><i>endo-1,4-β-D-glucanase</i> | AaCel9A<br>(3GZK)<br>0.7840                      |
|         |         | Cre17.g730550 |    | secreted<br>(RC1/0.915)       | secreted<br>(0.699)     | non-secreted<br>(0.402)      |                                                               |                                                  |
| CrCel9D | A8HW25  |               | 9  | other location<br>(RC2/0.911) | non-secreted<br>(0.111) | secreted<br>(0.629)          | -2.55<br>3.2.1.4<br>(0.9158)<br><i>endo-1,4-β-D-glucanase</i> | Cel9G<br>(1GA2)<br>0.6731                        |
|         |         | Cre06.g270500 | 9  | other location<br>(RC2/0.895) | non-secreted<br>(0.111) | secreted<br>(0.521)          |                                                               |                                                  |

**Supplementary Table S1 - Identification of cellulase genes in the nuclear genome of *C. reinhardtii***

A BLAST survey of the *C. reinhardtii* nuclear genome revealed the existence of endoglucanases and  $\beta$ -glucosidases. UniProtKB<sup>62</sup> data base accession numbers as well as the Phytozome 7.0 locus names<sup>63</sup> are given for available protein/gene annotations. Glycoside hydrolases family (GF) classification was performed using the Carbohydrate-Active Enzymes (CAZy) server<sup>64-66</sup>. Furthermore, we used the prediction server SignalP 4.0<sup>67</sup> in combination<sup>68</sup> with TargetP 1.1<sup>69</sup> to determine the likelihood of secretion for both available protein models (UniProt and Phytozome). The TargetP 1.1 localization prediction (settings: plant; no cutoffs)<sup>69</sup> is given with the reliability class in brackets. For the SignalP 4.0 results D-score values<sup>67</sup> (DS) are indicated in brackets as a measure for the prediction quality. Secretome P2.0<sup>70</sup> predictions (setting: mammalian) together with SecP-scores (SecPS) were included to consider non-classical (leaderless) secretion. The potential function of the proteins was inferred from *in silico* models created with I-TASSER<sup>25</sup> and confidence scores (C-score) as well as Enzyme Commission (EC) numbers with EC scores as a confidence measure are given. For each glycoside hydrolase the PDB entry showing the closest structural similarity is indicated together with respective TM scores as a measure for the similarity. A correct fold can be expected for models having C-score values  $>-1.5$  and determination of structure class / protein family requires TM scores  $> 0.5$ <sup>25</sup>.

## Supplementary Table S2.

| Protein                                  | UniProtKB | Phytozome     | GHF     | possible function (NCBI) / EC-number                                                                                                |
|------------------------------------------|-----------|---------------|---------|-------------------------------------------------------------------------------------------------------------------------------------|
| CrGHF2A                                  | A8IZ85    | Cre08.g379450 | 2       | $\beta$ -galactosidase (EC 3.2.1.23)                                                                                                |
| CrGHF3A                                  | A8JBP6    | Cre19.g752200 | 3       | xylan 1,4- $\beta$ -xylosidase (EC 3.2.1.37)<br>$\beta$ -glucosidase (EC 3.2.1.21)<br>$\alpha$ -L-arabinofuranosidase (EC 3.2.1.55) |
| CrGHF5A                                  | A8HN72    | Cre01.g048350 | 5       | $\beta$ -mannosidase (EC 3.2.1.25)                                                                                                  |
| CrGHF5B                                  | A8I258    | Cre02.g098000 | 5       | mannan endo- $\beta$ -1,4-mannosidase (EC 3.2.1.78)                                                                                 |
| CrGHF5C                                  | A8ITT2    | Cre07.g343950 | 5       | $\beta$ -1,3-mannanase (EC 3.2.1.-)                                                                                                 |
| CrGHF5D                                  | A8JDR6    | Cre12.g492800 | 5       |                                                                                                                                     |
| CrGHF5E                                  | A8JCF5    | Cre07.g337750 | 5       |                                                                                                                                     |
| CrGHF16A                                 | A8IEP7    | Cre03.g170700 | 16      | endo-1,3- $\beta$ -glucanase (laminarinase, EC 3.2.1.39)                                                                            |
| CrGHF16B                                 | A8IED3    | Cre03.g173100 | 16      | endo-1,3(4)- $\beta$ -glucanase (EC 3.2.1.6)                                                                                        |
| CrGHF16C                                 | A8IQ2     | Cre02.g115950 | 16      |                                                                                                                                     |
| CrGHF27A<br>(CrAGA1)                     | A8HQ67    | Cre01.g026250 | 27      | $\alpha$ -galactosidase (EC 3.2.1.22)                                                                                               |
| CrGHF28A                                 | A8IYS7    | Cre12.g556350 | 28      | polygalacturonase (pectinase, EC 3.2.1.15)<br>exo-polygalacturonase (EC 3.2.1.67)                                                   |
| CrGHF31A<br>(CrAGL1)                     | A8IWM1    | Cre03.g194700 | 31      | $\alpha$ -glucosidase (EC 3.2.1.20)<br>$\alpha$ -1,3-glucosidase (EC 3.2.1.84)                                                      |
| CrGHF31B                                 | A8IRW5    | Cre03.g190500 | 31      | $\alpha$ -xylosidase (EC 3.2.1.177)                                                                                                 |
| CrGHF32A                                 | A8ILB2    | Cre12.g488000 | 32      | $\beta$ -fructofuranosidase (invertase, EC 3.2.1.26)                                                                                |
| CrGHF32B                                 | A8ILB4    | Cre12.g488050 | 32      | endo-inulinase (EC 3.2.1.7)                                                                                                         |
| CrGHF32C                                 | -         | Cre12.g501900 | 32      | sucrose:sucrose 1-fructosyltransferase (EC 2.4.1.99)                                                                                |
| CrGHF32D                                 | -         | Cre12.g501850 | 32      | fructan:fructan 6G-fructosyltransferase (EC 2.4.1.243)                                                                              |
| CrGHF32E                                 | -         | Cre12.g507029 | 32      | fructan $\beta$ -(2,1)-fructosidase/1-exohydrolase (EC 3.2.1.153)                                                                   |
| CrGHF32F                                 | -         | Cre13.g582300 | 32      | fructan $\beta$ -(2,6)-fructosidase/6-exohydrolase (EC 3.2.1.154)                                                                   |
| CrGHF38A                                 | A8IG58    | Cre10.g437950 | 38      | $\alpha$ -mannosidase (EC 3.2.1.24)                                                                                                 |
| CrGHF42A                                 | A8JOP1    | Cre02.g141600 | 42      | $\beta$ -galactosidase (EC 3.2.1.23)<br>mannan endo- $\beta$ -1,4-mannosidase (EC 3.2.1.78)<br>$\beta$ -1,3-mannanase (EC 3.2.1.-)  |
| CrGHF47A<br>(CrAMD1)                     | A8JCH8    | Cre07.g336600 | 47      | $\alpha$ -mannosidase (EC 3.2.1.113)                                                                                                |
| CrGHF47B                                 | -         | Cre06.g301600 | 47      |                                                                                                                                     |
| CrGHF63A                                 | A8HTR3    | Cre13.g579750 | 63      | processing $\alpha$ -glucosidase (EC 3.2.1.106)<br>$\alpha$ -1,3-glucosidase (EC 3.2.1.84)<br>$\alpha$ -glucosidase (EC 3.2.1.20)   |
| CrGHF81A                                 | A8JHA2    | Cre12.g513400 | 81      | endo- $\beta$ -1,3-glucanase (EC 3.2.1.39)                                                                                          |
| <b>Cellulase-like (PF12876) proteins</b> |           |               |         |                                                                                                                                     |
| CrCelL1                                  | A8I673    | Cre07.g314850 | PF12876 | mannan endo- $\beta$ -1,4-mannosidase (EC 3.2.1.78)<br>$\beta$ -1,3-mannanase (EC 3.2.1.-)                                          |

### Supplementary Table S2 - Identification of hemicellulase genes in the genome of *C. reinhardtii*

*C. reinhardtii* glycoside hydrolase family (GHF) members<sup>62-66</sup> potentially implicated in the degradation of complex polysaccharides other than cellulose. UniProtKB<sup>62</sup> data base accession numbers are given in addition to the Phytozome 7.0 locus names<sup>63</sup> of identified genes. Functional predictions were inferred from NCBI BLAST<sup>71</sup> results.

### Supplementary Table S3.

| Observed  | Mr (expt) | Mr (calc) | ppm   | Miss | Score | Expect  | Rank | Peptide                                 |
|-----------|-----------|-----------|-------|------|-------|---------|------|-----------------------------------------|
| 971.5182  | 970.5109  | 970.5097  | 1.30  | 0    | 33    | 0.0079  | 1    | K.APEKPHHR.S                            |
| 1086.5726 | 1085.5653 | 1085.5618 | 3.22  | 0    | 40    | 0.0016  | 1    | R.AAGQWDIAVR.N                          |
| 1349.7686 | 1348.7613 | 1348.7575 | 2.80  | 0    | 49    | 0.0001  | 1    | R.HTANAALVALAAAR.G                      |
| 1366.6650 | 1365.6577 | 1365.6525 | 3.87  | 0    | 45    | 0.00031 | 1    | R.GDAGAGLEVAYSTR.V                      |
| 1774.7815 | 1773.7742 | 1773.7781 | -2.18 | 0    | 15    | 0.21    | 1    | R.FYEAQMMSGNVPSWSR.A<br>+ Oxidation (M) |

### Supplementary Table S3 - Mass spectrometric identification of CMCases

MASCOT (version 2.2.04) MS/MS Ion search results of mass spectrometric analyses performed with the band extracted from the zymogram shown in Fig. 1C. Both proteins CrCel9B (UniProtKB A8JFG8) and CrCel9C (UniProtKB A8JFH1) were identified with identical scores (MASCOT search score 98 / significance threshold 23). Observed, expected and calculated nominal masses (Mr) of peptides are given along with deviations (ppm). The number of missed cleavages (Miss), individual ion scores (Score), expect values (Expect), rank positions (Rank) and the amino acid sequence (Peptide) for each identified peptide are given. Identified peptides are all derived from the catalytic domains (amino acid 42-544 in A8JFG8 and 105-587 in A8JFH1) of the cellulases. The identity between both proteins in this region is 83.3% and the overall identity of the proteins is 64%.

**Supplementary Table S4.**

| <b>Name</b> | <b>Sequence 5' → 3'</b> |
|-------------|-------------------------|
| A8JFG8 fwd  | ACTGACTGGGGCTGTAACCA    |
| A8JFG8 rev  | GCGGTCCTTGTAAGCTTGTT    |
| A8JFH1 fwd  | CGTCTATGGGGACGTGAACT    |
| A8JFH1 rev  | AAGTCTGGGTGGAGGGAATC    |
| A8HW25 fwd  | GCATGGACTGGAACCTCAAT    |
| A8HW25 rev  | TTGGCTGTGGTGTACTTGGA    |
| A8I718 fwd  | GTGTGGCAGAACAGCTTTGA    |
| A8I718 rev  | CAGCACTGGATGTCTTCGTG    |
| A8IEM7 fwd  | ACTGGTGGGGCATCAACTAC    |
| A8IEM7 rev  | GTACATGGGAATGCCGAACT    |
| actin fwd   | ACGACACCACCTTCAACTCC    |
| actin rev   | ACATTTGCTGGAAGGTGGAC    |

**Supplementary Table S4 - Oligonucleotides used for RT-Q-PCR analyses**

#### Supplementary references

60. Khademi, S., Guarino, L.A., Watanabe, H., Tokuda, G. & Meyer, E.F. Structure of an endoglucanase from termite, *Nasutitermes takasagoensis*. *Acta Crystallogr.* **58D**, 653-659 (2002).
61. Mandelman, D. *et al.* X-Ray crystal structure of the multidomain endoglucanase Cel9G from *Clostridium cellulolyticum* complexed with natural and synthetic cello-oligosaccharides. *J. Bacteriol.* **185**, 4127-4135 (2003).
62. <http://www.uniprot.org/>
63. <http://www.phytozome.net>
64. <http://www.cazy.org/>
65. Cantarel, B.L. *et al.* The Carbohydrate-Active EnZymes database (CAZy): an expert resource for glycogenomics. *Nucleic Acids Res.* **37**, D233-D238 (2009).
66. Henrissat, B. A classification of glycosyl hydrolases based on amino-acid-sequence similarities. *Biochem. J.* **280**, 309-316 (1991).
67. Petersen, T.N., Brunak, S., von Heijne, G. & Nielsen, H. SignalP 4.0: discriminating signal peptides from transmembrane regions. *Nat. Meth.* **8**, 785-786 (2011).
68. Emanuelsson, O., Brunak, S., von Heijne, G. & Nielsen, H. Locating proteins in the cell using TargetP, SignalP and related tools. *Nat. Protoc.* **2**, 953-971 (2007).
69. Emanuelsson, O., Nielsen, H., Brunak, S.R. & von Heijne, G. Predicting subcellular localization of proteins based on their N-terminal amino acid sequence. *J. Mol. Biol.* **300**, 1005-1016 (2000).
70. Bendtsen, J. D., L. J. Jensen, N. Blom, G. Von Heijne & S. Brunak. Feature-based prediction of non-classical and leaderless protein secretion. *Protein Eng. Des. Sel.* **17**, 349-356 (2004).



71. <http://blast.ncbi.nlm.nih.gov/Blast.cgi>
